# Supplementary material for: An updated checklist of the Tenebrionidae sec. Bousquet et al. 2018 of the Algodones Dunes of California, with comments on checklist data practices
Source: Biodivers Data J. 2018 Jun 14;(6):e24927. doi: 10.3897/BDJ.6.e24927 (PMC6013544; doi:10.3897/BDJ.6.e24927)
Supplement: Supplementary material 1 — University of California at Davis - Bohart Museum data for the Tenebrionidae sec. Bousquet et al. 2018 from the Algodones, accessed January 10, 2018 [file bdj-06-e24927-s001.csv]

Taxon_Order	Bohart ID	Taxon Order	Family	Genus	Species	Collector	State Province	Country	Locality	Collection date	Month collected	Year collected	Microhabitat	Indentifier	Collection number	Collection method	Number individuals	Number males	Number females	Number other	Plant host	Plant association	Host association	Associated materials	Source Institution	Unique coden	Field notes	Comments	Life stage	Microhabitat	Common name	Vial no.	Jar no.	Tray no.	Shelf no.	Case no.	Building	Room
Coleoptera	91712	Coleoptera	Tenebrionidae	Araeroschizus	Araeroschizus sp.		California	United States	Algodones Dunes
Coleoptera	91713	Coleoptera	Tenebrionidae	Batulius	Batulius sp.		California	United States	Algodones Dunes
Coleoptera	91714	Coleoptera	Tenebrionidae	Eleodes	Eleodes lecontei		California	United States	Algodones Dunes
Coleoptera	91715	Coleoptera	Tenebrionidae	Alaephus	Alaephus macilentus		California	United States	Algodones Dunes						062	UV Trap
Coleoptera	91716	Coleoptera	Tenebrionidae	Anepsius	Anepsius delicatulus		California	United States	Algodones Dunes						003	Black light
Coleoptera	91717	Coleoptera	Tenebrionidae	Araeoschizus	Araeoschizus andrewsi		California	United States	Algodones Dunes						033	Pitfall					Larrea
Coleoptera	91718	Coleoptera	Tenebrionidae	Araeoschizus	Araeoschizus hardyi		California	United States	Algodones Dunes						003	Pitfall
Coleoptera	91719	Coleoptera	Tenebrionidae	Araeoschizus	Araeoschizus hystrix		California	United States	Algodones Dunes						059	Malaise
Coleoptera	91720	Coleoptera	Tenebrionidae	Asbolus	Asbolus laevis		California	United States	Algodones Dunes						003	Black light
Coleoptera	91721	Coleoptera	Tenebrionidae	Asbolus	Asbolus papillosus		California	United States	Algodones Dunes						030	Sweep
Coleoptera	91722	Coleoptera	Tenebrionidae	Asbolus	Asbolus verrucoso		California	United States	Algodones Dunes						003	Black light
Coleoptera	91723	Coleoptera	Tenebrionidae	Batuliodes	Batuliodes wasbaueri		California	United States	Algodones Dunes						053	YPT
Coleoptera	91724	Coleoptera	Tenebrionidae	Batulius	Batulius setosus		California	United States	Algodones Dunes						033	Pitfall					Larrea
Coleoptera	91725	Coleoptera	Tenebrionidae	Blapstinus	Blapstinus histricus		California	United States	Algodones Dunes						003	Black light
Coleoptera	91726	Coleoptera	Tenebrionidae	Cerenopus	Cerenopus concolor		California	United States	Algodones Dunes						031	Pitfall
Coleoptera	91727	Coleoptera	Tenebrionidae	Cheirodes	Cheirodes californica		California	United States	Algodones Dunes						030	Pitfall
Coleoptera	91728	Coleoptera	Tenebrionidae	Chilometopon	Chilometopon abnormis		California	United States	Algodones Dunes						003	Black light
Coleoptera	91729	Coleoptera	Tenebrionidae	Chilometopon	Chilometopon brachystomum		California	United States	Algodones Dunes						126	Malaise
Coleoptera	91730	Coleoptera	Tenebrionidae	Chilometopon	Chilometopon pallidum		California	United States	Algodones Dunes						002	YPT
Coleoptera	91731	Coleoptera	Tenebrionidae	Cnemodinus	Cnemodinus testaceus		California	United States	Algodones Dunes						030	Malaise
Coleoptera	91732	Coleoptera	Tenebrionidae	Cryptoglossa	Cryptoglossa muricata		California	United States	Algodones Dunes						031	Light trap
Coleoptera	91733	Coleoptera	Tenebrionidae	Edrotes	Edrotes arens		California	United States	Algodones Dunes						002	YPT
Coleoptera	91734	Coleoptera	Tenebrionidae	Edrotes	Edrotes ventricosus		California	United States	Algodones Dunes						003	Black light
Coleoptera	91735	Coleoptera	Tenebrionidae	Eleodes	Eleodes armatus		California	United States	Algodones Dunes						003	Black light
Coleoptera	91736	Coleoptera	Tenebrionidae	Embaphion	Embaphion depressum		California	United States	Algodones Dunes						005	YPT
Coleoptera	91737	Coleoptera	Tenebrionidae	Eusattus	Eusattus dilatatus		California	United States	Algodones Dunes						001
Coleoptera	91738	Coleoptera	Tenebrionidae	Eusattus	Eusattus productus		California	United States	Algodones Dunes						053	YPT
Coleoptera	91739	Coleoptera	Tenebrionidae	Eusophulus	Eusophulus Castaneus		California	United States	Algodones Dunes						031	Malaise
Coleoptera	91740	Coleoptera	Tenebrionidae	Helops	Helops N. Sp.		California	United States	Algodones Dunes						059	Malaise
Coleoptera	91741	Coleoptera	Tenebrionidae	Hylocrinus	Hylocrinus sp.		California	United States	Algodones Dunes						031	Pitfall
Coleoptera	91742	Coleoptera	Tenebrionidae	Hymenorus	Hymenorus sp.		California	United States	Algodones Dunes						003	Malaise
Coleoptera	91743	Coleoptera	Tenebrionidae	Hymenorus	Hymenorus sp.		California	United States	Algodones Dunes						003	Black light
Coleoptera	91744	Coleoptera	Tenebrionidae	Latheticus	Latheticus oryzae		California	United States	Algodones Dunes						005	UV Trap
Coleoptera	91745	Coleoptera	Tenebrionidae	Latheticus	Latheticus prosopis		California	United States	Algodones Dunes						033	Light Trap					Creosote
Coleoptera	91746	Coleoptera	Tenebrionidae	Mecysmus	Mecysmus angustus		California	United States	Algodones Dunes						003	Black light
Coleoptera	91747	Coleoptera	Tenebrionidae	Metoponium	Metoponium sp.		California	United States	Algodones Dunes						002	Malaise
Coleoptera	91748	Coleoptera	Tenebrionidae	Nocibiotes	Nocibiotes crassipes		California	United States	Algodones Dunes						005	Pitfall
Coleoptera	91749	Coleoptera	Tenebrionidae	Nocibiotes	Nocibiotes granulatus		California	United States	Algodones Dunes						003	Pitfall
Coleoptera	91750	Coleoptera	Tenebrionidae	Notibius	Notibius laticeps		California	United States	Algodones Dunes						003	Pitfall
Coleoptera	91751	Coleoptera	Tenebrionidae	Telabis	Telabis serrata		California	United States	Algodones Dunes						003	Black light
Coleoptera	91752	Coleoptera	Tenebrionidae	Telabis	Telabis sp.		California	United States	Algodones Dunes						062	UV Trap
Coleoptera	91753	Coleoptera	Tenebrionidae	Tonibius	Tonibius sulcatus		California	United States	Algodones Dunes						003	Pitfall
Coleoptera	91754	Coleoptera	Tenebrionidae	Tribolium	Tribolium castaneum		California	United States	Algodones Dunes						008	Pitfall
Coleoptera	91755	Coleoptera	Tenebrionidae	Triorophus	Triorophus laevis		California	United States	Algodones Dunes						003	Pitfall
Coleoptera	91756	Coleoptera	Tenebrionidae	Ulus	Ulus crassus		California	United States	Algodones Dunes						003	Black light
Coleoptera	91757	Coleoptera	Tenebrionidae	Anepsius	Anepsius delicatulus		California	United States	Algodones Dunes						003	Malaise
Coleoptera	91758	Coleoptera	Tenebrionidae	Anepsius	Anepsius delicatulus		California	United States	Algodones Dunes						021	Pitfall
Coleoptera	91759	Coleoptera	Tenebrionidae	Anepsius	Anepsius delicatulus		California	United States	Algodones Dunes						031	Pitfall
Coleoptera	91760	Coleoptera	Tenebrionidae	Anepsius	Anepsius delicatulus		California	United States	Algodones Dunes						053	Pitfall
Coleoptera	91761	Coleoptera	Tenebrionidae	Anepsius	Anepsius delicatulus		California	United States	Algodones Dunes						062	Pitfall
Coleoptera	91762	Coleoptera	Tenebrionidae	Araeoschizus	Araeoschizus andrewsi		California	United States	Algodones Dunes						034	Pitfall
Coleoptera	91763	Coleoptera	Tenebrionidae	Araeoschizus	Araeoschizus andrewsi		California	United States	Algodones Dunes						034	YPT
Coleoptera	91764	Coleoptera	Tenebrionidae	Araeoschizus	Araeoschizus andrewsi		California	United States	Algodones Dunes						051	Pitfall/YPT
Coleoptera	91765	Coleoptera	Tenebrionidae	Araeoschizus	Araeoschizus andrewsi		California	United States	Algodones Dunes						061	Pitfall
Coleoptera	91766	Coleoptera	Tenebrionidae	Araeoschizus	Araeoschizus andrewsi		California	United States	Algodones Dunes						067	Pitfall
Coleoptera	91767	Coleoptera	Tenebrionidae	Araeoschizus	Araeoschizus hardyi		California	United States	Algodones Dunes						008	Pitfall
Coleoptera	91768	Coleoptera	Tenebrionidae	Araeoschizus	Araeoschizus hardyi		California	United States	Algodones Dunes						020	Pitfall
Coleoptera	91769	Coleoptera	Tenebrionidae	Araeoschizus	Araeoschizus hardyi		California	United States	Algodones Dunes						063	Pitfall
Coleoptera	91770	Coleoptera	Tenebrionidae	Asbolus	Asbolus laevis		California	United States	Algodones Dunes						007	Pitfall
Coleoptera	91771	Coleoptera	Tenebrionidae	Asbolus	Asbolus laevis		California	United States	Algodones Dunes						008	Pitfall
Coleoptera	91772	Coleoptera	Tenebrionidae	Asbolus	Asbolus laevis		California	United States	Algodones Dunes						032	Sweep
Coleoptera	91773	Coleoptera	Tenebrionidae	Asbolus	Asbolus laevis		California	United States	Algodones Dunes						037	By net
Coleoptera	91774	Coleoptera	Tenebrionidae	Asbolus	Asbolus laevis		California	United States	Algodones Dunes						051	Pitfall/ YPT
Coleoptera	91775	Coleoptera	Tenebrionidae	Asbolus	Asbolus laevis		California	United States	Algodones Dunes						063	Pitfall
Coleoptera	91776	Coleoptera	Tenebrionidae	Asbolus	Asbolus laevis		California	United States	Algodones Dunes						093	Black light
Coleoptera	91777	Coleoptera	Tenebrionidae	Asbolus	Asbolus laevis		California	United States	Algodones Dunes						112	Pitfall
Coleoptera	91778	Coleoptera	Tenebrionidae	Asbolus	Asbolus laevis		California	United States	Algodones Dunes						114	YPT
Coleoptera	91779	Coleoptera	Tenebrionidae	Asbolus	Asbolus papillosus		California	United States	Algodones Dunes						034	Pitfall
Coleoptera	91780	Coleoptera	Tenebrionidae	Asbolus	Asbolus papillosus		California	United States	Algodones Dunes						051	Pitfall/ YPT
Coleoptera	91781	Coleoptera	Tenebrionidae	Asbolus	Asbolus papillosus		California	United States	Algodones Dunes						056
Coleoptera	91782	Coleoptera	Tenebrionidae	Asbolus	Asbolus papillosus		California	United States	Algodones Dunes						061	Pantrap
Coleoptera	91783	Coleoptera	Tenebrionidae	Asbolus	Asbolus papillosus		California	United States	Algodones Dunes						067	Pitfall
Coleoptera	91784	Coleoptera	Tenebrionidae	Asbolus	Asbolus papillosus		California	United States	Algodones Dunes						112	Pitfall
Coleoptera	91785	Coleoptera	Tenebrionidae	Asbolus	Asbolus verrucoso		California	United States	Algodones Dunes						003	Pitfall
Coleoptera	91786	Coleoptera	Tenebrionidae	Asbolus	Asbolus verrucoso		California	United States	Algodones Dunes						003	YPT
Coleoptera	91787	Coleoptera	Tenebrionidae	Asbolus	Asbolus verrucoso		California	United States	Algodones Dunes						030	Pitfall
Coleoptera	91788	Coleoptera	Tenebrionidae	Asbolus	Asbolus verrucoso		California	United States	Algodones Dunes						031	Pitfall
Coleoptera	91789	Coleoptera	Tenebrionidae	Asbolus	Asbolus verrucoso		California	United States	Algodones Dunes						032	Pitfall
Coleoptera	91790	Coleoptera	Tenebrionidae	Asbolus	Asbolus verrucoso		California	United States	Algodones Dunes						037	Sweep
Coleoptera	91791	Coleoptera	Tenebrionidae	Asbolus	Asbolus verrucoso		California	United States	Algodones Dunes						052	Pitfall/ YPT
Coleoptera	91792	Coleoptera	Tenebrionidae	Asbolus	Asbolus verrucoso		California	United States	Algodones Dunes						053	Pitfall/ YPT
Coleoptera	91793	Coleoptera	Tenebrionidae	Asbolus	Asbolus verrucoso		California	United States	Algodones Dunes						054	Pitfall/ YPT
Coleoptera	91794	Coleoptera	Tenebrionidae	Asbolus	Asbolus verrucoso		California	United States	Algodones Dunes						060	Pitfall
Coleoptera	91795	Coleoptera	Tenebrionidae	Asbolus	Asbolus verrucoso		California	United States	Algodones Dunes						062	Pitfall
Coleoptera	91796	Coleoptera	Tenebrionidae	Asbolus	Asbolus verrucoso		California	United States	Algodones Dunes						063	Pitfall
Coleoptera	91797	Coleoptera	Tenebrionidae	Asbolus	Asbolus verrucoso		California	United States	Algodones Dunes						114	YPT
Coleoptera	91798	Coleoptera	Tenebrionidae	Batulius	Batulius setosus		California	United States	Algodones Dunes						067	Pitfall
Coleoptera	91799	Coleoptera	Tenebrionidae	Blapstinus	Blapstinus histricus		California	United States	Algodones Dunes						005	Pitfall
Coleoptera	91800	Coleoptera	Tenebrionidae	Blapstinus	Blapstinus histricus		California	United States	Algodones Dunes						005	YPT
Coleoptera	91801	Coleoptera	Tenebrionidae	Blapstinus	Blapstinus histricus		California	United States	Algodones Dunes						005	UV Trap
Coleoptera	91802	Coleoptera	Tenebrionidae	Blapstinus	Blapstinus histricus		California	United States	Algodones Dunes						033	Light Trap
Coleoptera	91803	Coleoptera	Tenebrionidae	Blapstinus	Blapstinus histricus		California	United States	Algodones Dunes						061	By net
Coleoptera	91804	Coleoptera	Tenebrionidae	Blapstinus	Blapstinus histricus		California	United States	Algodones Dunes						062	UV Trap
Coleoptera	91805	Coleoptera	Tenebrionidae	Blapstinus	Blapstinus histricus		California	United States	Algodones Dunes						067	Pitfall
Coleoptera	91806	Coleoptera	Tenebrionidae	Blapstinus	Blapstinus histricus		California	United States	Algodones Dunes						069	By net					Psorothamnus spinosus
Coleoptera	91807	Coleoptera	Tenebrionidae	Blapstinus	Blapstinus histricus		California	United States	Algodones Dunes						094	Malaise
Coleoptera	91808	Coleoptera	Tenebrionidae	Blapstinus	Blapstinus histricus		California	United States	Algodones Dunes						094	UV Trap
Coleoptera	91809	Coleoptera	Tenebrionidae	Blapstinus	Blapstinus histricus		California	United States	Algodones Dunes						116	Malaise
Coleoptera	91810	Coleoptera	Tenebrionidae	Cerenopus	Cerenopus concolor		California	United States	Algodones Dunes						053	Pitfall/ YPT
Coleoptera	91811	Coleoptera	Tenebrionidae	Cerenopus	Cerenopus concolor		California	United States	Algodones Dunes						062	Pitfall
Coleoptera	91812	Coleoptera	Tenebrionidae	Cerenopus	Cerenopus concolor		California	United States	Algodones Dunes						063	Pitfall
Coleoptera	91813	Coleoptera	Tenebrionidae	Cheirodes	Cheirodes californica		California	United States	Algodones Dunes						034	Pitfall
Coleoptera	91814	Coleoptera	Tenebrionidae	Chilometopon	Chilometopon abnormis		California	United States	Algodones Dunes						005	Pitfall
Coleoptera	91815	Coleoptera	Tenebrionidae	Chilometopon	Chilometopon abnormis		California	United States	Algodones Dunes						005	UV Trap
Coleoptera	91816	Coleoptera	Tenebrionidae	Chilometopon	Chilometopon abnormis		California	United States	Algodones Dunes						005	YPT
Coleoptera	91817	Coleoptera	Tenebrionidae	Chilometopon	Chilometopon abnormis		California	United States	Algodones Dunes						007	Malaise
Coleoptera	91818	Coleoptera	Tenebrionidae	Chilometopon	Chilometopon abnormis		California	United States	Algodones Dunes						051	UV Trap
Coleoptera	91819	Coleoptera	Tenebrionidae	Chilometopon	Chilometopon abnormis		California	United States	Algodones Dunes						052	Malaise
Coleoptera	91820	Coleoptera	Tenebrionidae	Chilometopon	Chilometopon abnormis		California	United States	Algodones Dunes						052	Pitfall/ YPT
Coleoptera	91821	Coleoptera	Tenebrionidae	Chilometopon	Chilometopon abnormis		California	United States	Algodones Dunes						055	Malaise
Coleoptera	91822	Coleoptera	Tenebrionidae	Chilometopon	Chilometopon abnormis		California	United States	Algodones Dunes						061	By net
Coleoptera	91823	Coleoptera	Tenebrionidae	Chilometopon	Chilometopon abnormis		California	United States	Algodones Dunes						061	Sweep					Psorothamnus
Coleoptera	91824	Coleoptera	Tenebrionidae	Chilometopon	Chilometopon abnormis		California	United States	Algodones Dunes						062	Pitfall
Coleoptera	91825	Coleoptera	Tenebrionidae	Chilometopon	Chilometopon abnormis		California	United States	Algodones Dunes						062	UV Trap
Coleoptera	91826	Coleoptera	Tenebrionidae	Chilometopon	Chilometopon abnormis		California	United States	Algodones Dunes						063	Pitfall
Coleoptera	91827	Coleoptera	Tenebrionidae	Chilometopon	Chilometopon abnormis		California	United States	Algodones Dunes						091	Malaise
Coleoptera	91828	Coleoptera	Tenebrionidae	Chilometopon	Chilometopon abnormis		California	United States	Algodones Dunes						110	Malaise
Coleoptera	91829	Coleoptera	Tenebrionidae	Chilometopon	Chilometopon abnormis		California	United States	Algodones Dunes						112	Malaise
Coleoptera	91830	Coleoptera	Tenebrionidae	Chilometopon	Chilometopon abnormis		California	United States	Algodones Dunes						114	Malaise
Coleoptera	91831	Coleoptera	Tenebrionidae	Chilometopon	Chilometopon abnormis		California	United States	Algodones Dunes						116	Malaise
Coleoptera	91832	Coleoptera	Tenebrionidae	Chilometopon	Chilometopon abnormis		California	United States	Algodones Dunes						120	Malaise
Coleoptera	91833	Coleoptera	Tenebrionidae	Chilometopon	Chilometopon abnormis		California	United States	Algodones Dunes						125	Malaise
Coleoptera	91834	Coleoptera	Tenebrionidae	Chilometopon	Chilometopon abnormis		California	United States	Algodones Dunes						126	Malaise
Coleoptera	91835	Coleoptera	Tenebrionidae	Chilometopon	Chilometopon pallidum		California	United States	Algodones Dunes						003	Black light
Coleoptera	91836	Coleoptera	Tenebrionidae	Chilometopon	Chilometopon pallidum		California	United States	Algodones Dunes						003	Pitfall
Coleoptera	91837	Coleoptera	Tenebrionidae	Chilometopon	Chilometopon pallidum		California	United States	Algodones Dunes						005	Malaise
Coleoptera	91838	Coleoptera	Tenebrionidae	Chilometopon	Chilometopon pallidum		California	United States	Algodones Dunes						005	Pitfall
Coleoptera	91839	Coleoptera	Tenebrionidae	Chilometopon	Chilometopon pallidum		California	United States	Algodones Dunes						005	UV Trap
Coleoptera	91840	Coleoptera	Tenebrionidae	Chilometopon	Chilometopon pallidum		California	United States	Algodones Dunes						005	YPT
Coleoptera	91841	Coleoptera	Tenebrionidae	Chilometopon	Chilometopon pallidum		California	United States	Algodones Dunes						007	Pitfall
Coleoptera	91842	Coleoptera	Tenebrionidae	Chilometopon	Chilometopon pallidum		California	United States	Algodones Dunes						008	Malaise
Coleoptera	91843	Coleoptera	Tenebrionidae	Chilometopon	Chilometopon pallidum		California	United States	Algodones Dunes						051	UV Trap
Coleoptera	91844	Coleoptera	Tenebrionidae	Chilometopon	Chilometopon pallidum		California	United States	Algodones Dunes						061	By net
Coleoptera	91845	Coleoptera	Tenebrionidae	Chilometopon	Chilometopon pallidum		California	United States	Algodones Dunes						061	Malaise
Coleoptera	91846	Coleoptera	Tenebrionidae	Chilometopon	Chilometopon pallidum		California	United States	Algodones Dunes						061	Pantrap
Coleoptera	91847	Coleoptera	Tenebrionidae	Chilometopon	Chilometopon pallidum		California	United States	Algodones Dunes						061	Pitfall
Coleoptera	91848	Coleoptera	Tenebrionidae	Chilometopon	Chilometopon pallidum		California	United States	Algodones Dunes						061	Sweep					Psorothamnus
Coleoptera	91849	Coleoptera	Tenebrionidae	Chilometopon	Chilometopon pallidum		California	United States	Algodones Dunes						064	Malaise
Coleoptera	91850	Coleoptera	Tenebrionidae	Chilometopon	Chilometopon pallidum		California	United States	Algodones Dunes						065	Black light
Coleoptera	91851	Coleoptera	Tenebrionidae	Chilometopon	Chilometopon pallidum		California	United States	Algodones Dunes						067	Black light
Coleoptera	91852	Coleoptera	Tenebrionidae	Chilometopon	Chilometopon pallidum		California	United States	Algodones Dunes						067	Pitfall
Coleoptera	91853	Coleoptera	Tenebrionidae	Chilometopon	Chilometopon pallidum		California	United States	Algodones Dunes						067	Screen sand
Coleoptera	91854	Coleoptera	Tenebrionidae	Chilometopon	Chilometopon pallidum		California	United States	Algodones Dunes						098	Malaise
Coleoptera	91855	Coleoptera	Tenebrionidae	Chilometopon	Chilometopon pallidum		California	United States	Algodones Dunes						112	Malaise
Coleoptera	91856	Coleoptera	Tenebrionidae	Chilometopon	Chilometopon pallidum		California	United States	Algodones Dunes						113	Black light
Coleoptera	91857	Coleoptera	Tenebrionidae	Chilometopon	Chilometopon pallidum		California	United States	Algodones Dunes						116	Malaise
Coleoptera	91858	Coleoptera	Tenebrionidae	Chilometopon	Chilometopon pallidum		California	United States	Algodones Dunes						120	Malaise
Coleoptera	91859	Coleoptera	Tenebrionidae	Chilometopon	Chilometopon pallidum		California	United States	Algodones Dunes						125	Malaise
Coleoptera	91860	Coleoptera	Tenebrionidae	Cnemodinus	Cnemodinus testaceus		California	United States	Algodones Dunes						031	YPT
Coleoptera	91861	Coleoptera	Tenebrionidae	Cnemodinus	Cnemodinus testaceus		California	United States	Algodones Dunes						033	Light trap
Coleoptera	91862	Coleoptera	Tenebrionidae	Cnemodinus	Cnemodinus testaceus		California	United States	Algodones Dunes						033	Malaise
Coleoptera	91863	Coleoptera	Tenebrionidae	Cryptoglossa	Cryptoglossa muricata		California	United States	Algodones Dunes						033	Pitfall
Coleoptera	91864	Coleoptera	Tenebrionidae	Cryptoglossa	Cryptoglossa muricata		California	United States	Algodones Dunes						054	Pitfall/ YPT
Coleoptera	91865	Coleoptera	Tenebrionidae	Cryptoglossa	Cryptoglossa muricata		California	United States	Algodones Dunes						060	Pitfall
Coleoptera	91866	Coleoptera	Tenebrionidae	Cryptoglossa	Cryptoglossa muricata		California	United States	Algodones Dunes						067	Pitfall
Coleoptera	91867	Coleoptera	Tenebrionidae	Edrotes	Edrotes arens		California	United States	Algodones Dunes						007	Pitfall
Coleoptera	91868	Coleoptera	Tenebrionidae	Edrotes	Edrotes arens		California	United States	Algodones Dunes						037	By net
Coleoptera	91869	Coleoptera	Tenebrionidae	Edrotes	Edrotes arens		California	United States	Algodones Dunes						061	Pitfall
Coleoptera	91870	Coleoptera	Tenebrionidae	Edrotes	Edrotes arens		California	United States	Algodones Dunes						061	Sweep					Psorothamnus
Coleoptera	91871	Coleoptera	Tenebrionidae	Edrotes	Edrotes ventricosus		California	United States	Algodones Dunes						003	Pitfall
Coleoptera	91872	Coleoptera	Tenebrionidae	Edrotes	Edrotes ventricosus		California	United States	Algodones Dunes						003	YPT
Coleoptera	91873	Coleoptera	Tenebrionidae	Edrotes	Edrotes ventricosus		California	United States	Algodones Dunes						008	Pitfall
Coleoptera	91874	Coleoptera	Tenebrionidae	Edrotes	Edrotes ventricosus		California	United States	Algodones Dunes						031	Pitfall
Coleoptera	91875	Coleoptera	Tenebrionidae	Edrotes	Edrotes ventricosus		California	United States	Algodones Dunes						033	Pitfall
Coleoptera	91876	Coleoptera	Tenebrionidae	Edrotes	Edrotes ventricosus		California	United States	Algodones Dunes						034	Pitfall
Coleoptera	91877	Coleoptera	Tenebrionidae	Edrotes	Edrotes ventricosus		California	United States	Algodones Dunes						034	Screen sand
Coleoptera	91878	Coleoptera	Tenebrionidae	Edrotes	Edrotes ventricosus		California	United States	Algodones Dunes						051	Pitfall/ YPT
Coleoptera	91879	Coleoptera	Tenebrionidae	Edrotes	Edrotes ventricosus		California	United States	Algodones Dunes						063	Pitfall
Coleoptera	91880	Coleoptera	Tenebrionidae	Edrotes	Edrotes ventricosus		California	United States	Algodones Dunes						067	Pitfall
Coleoptera	91881	Coleoptera	Tenebrionidae	Edrotes	Edrotes ventricosus		California	United States	Algodones Dunes						070	Mercury Vapor
Coleoptera	91882	Coleoptera	Tenebrionidae	Edrotes	Edrotes ventricosus		California	United States	Algodones Dunes						112	Pitfall
Coleoptera	91883	Coleoptera	Tenebrionidae	Eleodes	Eleodes armatus		California	United States	Algodones Dunes						003	Pitfall
Coleoptera	91884	Coleoptera	Tenebrionidae	Eleodes	Eleodes armatus		California	United States	Algodones Dunes						003	YPT
Coleoptera	91885	Coleoptera	Tenebrionidae	Eleodes	Eleodes armatus		California	United States	Algodones Dunes						005	Pitfall
Coleoptera	91886	Coleoptera	Tenebrionidae	Eleodes	Eleodes armatus		California	United States	Algodones Dunes						005	YPT
Coleoptera	91887	Coleoptera	Tenebrionidae	Eleodes	Eleodes armatus		California	United States	Algodones Dunes						020	Pitfall
Coleoptera	91888	Coleoptera	Tenebrionidae	Eleodes	Eleodes armatus		California	United States	Algodones Dunes						021	Pitfall
Coleoptera	91889	Coleoptera	Tenebrionidae	Eleodes	Eleodes armatus		California	United States	Algodones Dunes						022	Pitfall
Coleoptera	91890	Coleoptera	Tenebrionidae	Eleodes	Eleodes armatus		California	United States	Algodones Dunes						023	Pitfall
Coleoptera	91891	Coleoptera	Tenebrionidae	Eleodes	Eleodes armatus		California	United States	Algodones Dunes						023	YPT
Coleoptera	91892	Coleoptera	Tenebrionidae	Eleodes	Eleodes armatus		California	United States	Algodones Dunes						024	Pitfall
Coleoptera	91893	Coleoptera	Tenebrionidae	Eleodes	Eleodes armatus		California	United States	Algodones Dunes						031	Pitfall
Coleoptera	91894	Coleoptera	Tenebrionidae	Eleodes	Eleodes armatus		California	United States	Algodones Dunes						032	Pitfall
Coleoptera	91895	Coleoptera	Tenebrionidae	Eleodes	Eleodes armatus		California	United States	Algodones Dunes						033	Pitfall
Coleoptera	91896	Coleoptera	Tenebrionidae	Eleodes	Eleodes armatus		California	United States	Algodones Dunes						034	Pitfall
Coleoptera	91897	Coleoptera	Tenebrionidae	Eleodes	Eleodes armatus		California	United States	Algodones Dunes						034	YPT
Coleoptera	91898	Coleoptera	Tenebrionidae	Eleodes	Eleodes armatus		California	United States	Algodones Dunes						034	Screen sand
Coleoptera	91899	Coleoptera	Tenebrionidae	Eleodes	Eleodes armatus		California	United States	Algodones Dunes						036	Malaise
Coleoptera	91900	Coleoptera	Tenebrionidae	Eleodes	Eleodes armatus		California	United States	Algodones Dunes						037	By net
Coleoptera	91901	Coleoptera	Tenebrionidae	Eleodes	Eleodes armatus		California	United States	Algodones Dunes						038	By net
Coleoptera	91902	Coleoptera	Tenebrionidae	Eleodes	Eleodes armatus		California	United States	Algodones Dunes						051	Pitfall/ YPT
Coleoptera	91903	Coleoptera	Tenebrionidae	Eleodes	Eleodes armatus		California	United States	Algodones Dunes						051	Screen sand
Coleoptera	91904	Coleoptera	Tenebrionidae	Eleodes	Eleodes armatus		California	United States	Algodones Dunes						052	Pitfall
Coleoptera	91905	Coleoptera	Tenebrionidae	Eleodes	Eleodes armatus		California	United States	Algodones Dunes						053	Pitfall
Coleoptera	91906	Coleoptera	Tenebrionidae	Eleodes	Eleodes armatus		California	United States	Algodones Dunes						053	Pitfall/YPT
Coleoptera	91907	Coleoptera	Tenebrionidae	Eleodes	Eleodes armatus		California	United States	Algodones Dunes						054	Pitfall/YPT
Coleoptera	91908	Coleoptera	Tenebrionidae	Eleodes	Eleodes armatus		California	United States	Algodones Dunes						062	Pitfall
Coleoptera	91909	Coleoptera	Tenebrionidae	Eleodes	Eleodes armatus		California	United States	Algodones Dunes						063	Pitfall
Coleoptera	91910	Coleoptera	Tenebrionidae	Eleodes	Eleodes armatus		California	United States	Algodones Dunes						114	YPT
Coleoptera	91911	Coleoptera	Tenebrionidae	Eleodes	Eleodes armatus		California	United States	Algodones Dunes						117	YPT
Coleoptera	91912	Coleoptera	Tenebrionidae	Eusattus	Eusattus dilatatus		California	United States	Algodones Dunes						002	Malaise
Coleoptera	91913	Coleoptera	Tenebrionidae	Eusattus	Eusattus dilatatus		California	United States	Algodones Dunes						005	Pitfall
Coleoptera	91914	Coleoptera	Tenebrionidae	Eusattus	Eusattus dilatatus		California	United States	Algodones Dunes						005	YPT
Coleoptera	91915	Coleoptera	Tenebrionidae	Eusattus	Eusattus dilatatus		California	United States	Algodones Dunes						007	Pitfall
Coleoptera	91916	Coleoptera	Tenebrionidae	Eusattus	Eusattus dilatatus		California	United States	Algodones Dunes						008	Pitfall
Coleoptera	91917	Coleoptera	Tenebrionidae	Eusattus	Eusattus dilatatus		California	United States	Algodones Dunes						051	Screen sand
Coleoptera	91918	Coleoptera	Tenebrionidae	Eusattus	Eusattus dilatatus		California	United States	Algodones Dunes						067	Screen sand
Coleoptera	91919	Coleoptera	Tenebrionidae	Eusattus	Eusattus dilatatus		California	United States	Algodones Dunes						067	Pitfall
Coleoptera	91920	Coleoptera	Tenebrionidae	Eusattus	Eusattus dilatatus		California	United States	Algodones Dunes						112	Pitfall
Coleoptera	91921	Coleoptera	Tenebrionidae	Eusophulus	Eusophulus Castaneus		California	United States	Algodones Dunes						031	Black light
Coleoptera	91922	Coleoptera	Tenebrionidae	Eusophulus	Eusophulus Castaneus		California	United States	Algodones Dunes						053	UV Trap
Coleoptera	91923	Coleoptera	Tenebrionidae	Helops	Helops N. Sp.		California	United States	Algodones Dunes						062	Pitfall
Coleoptera	91924	Coleoptera	Tenebrionidae	Hylocrinus	Hylocrinus sp.		California	United States	Algodones Dunes						059	Malaise
Coleoptera	91925	Coleoptera	Tenebrionidae	Hymenorus	Hymenorus sp.		California	United States	Algodones Dunes						003	Malaise
Coleoptera	91926	Coleoptera	Tenebrionidae	Hymenorus	Hymenorus sp.		California	United States	Algodones Dunes						003	YPT
Coleoptera	91927	Coleoptera	Tenebrionidae	Hymenorus	Hymenorus sp.		California	United States	Algodones Dunes						005	Black light
Coleoptera	91928	Coleoptera	Tenebrionidae	Hymenorus	Hymenorus sp.		California	United States	Algodones Dunes						005	Malaise
Coleoptera	91929	Coleoptera	Tenebrionidae	Hymenorus	Hymenorus sp.		California	United States	Algodones Dunes						005	Pitfall
Coleoptera	91930	Coleoptera	Tenebrionidae	Hymenorus	Hymenorus sp.		California	United States	Algodones Dunes						005	UV Trap
Coleoptera	91931	Coleoptera	Tenebrionidae	Hymenorus	Hymenorus sp.		California	United States	Algodones Dunes						005	YPT
Coleoptera	91932	Coleoptera	Tenebrionidae	Hymenorus	Hymenorus sp.		California	United States	Algodones Dunes						007	Malaise
Coleoptera	91933	Coleoptera	Tenebrionidae	Hymenorus	Hymenorus sp.		California	United States	Algodones Dunes						008	Malaise
Coleoptera	91934	Coleoptera	Tenebrionidae	Hymenorus	Hymenorus sp.		California	United States	Algodones Dunes						008	YPT
Coleoptera	91935	Coleoptera	Tenebrionidae	Hymenorus	Hymenorus sp.		California	United States	Algodones Dunes						059	Malaise
Coleoptera	91936	Coleoptera	Tenebrionidae	Hymenorus	Hymenorus sp.		California	United States	Algodones Dunes						060	Malaise
Coleoptera	91937	Coleoptera	Tenebrionidae	Hymenorus	Hymenorus sp.		California	United States	Algodones Dunes						062	UV Trap
Coleoptera	91938	Coleoptera	Tenebrionidae	Hymenorus	Hymenorus sp.		California	United States	Algodones Dunes						065	Black light
Coleoptera	91939	Coleoptera	Tenebrionidae	Hymenorus	Hymenorus sp.		California	United States	Algodones Dunes						067	Black light
Coleoptera	91940	Coleoptera	Tenebrionidae	Hymenorus	Hymenorus sp.		California	United States	Algodones Dunes						093	Black light
Coleoptera	91941	Coleoptera	Tenebrionidae	Hymenorus	Hymenorus sp.		California	United States	Algodones Dunes						093	Malaise
Coleoptera	91942	Coleoptera	Tenebrionidae	Hymenorus	Hymenorus sp.		California	United States	Algodones Dunes						111	YPT
Coleoptera	91943	Coleoptera	Tenebrionidae	Hymenorus	Hymenorus sp.		California	United States	Algodones Dunes						112	Malaise
Coleoptera	91944	Coleoptera	Tenebrionidae	Hymenorus	Hymenorus sp.		California	United States	Algodones Dunes						114	Malaise
Coleoptera	91945	Coleoptera	Tenebrionidae	Hymenorus	Hymenorus sp.		California	United States	Algodones Dunes						115	Malaise
Coleoptera	91946	Coleoptera	Tenebrionidae	Hymenorus	Hymenorus sp.		California	United States	Algodones Dunes						115	YPT
Coleoptera	91947	Coleoptera	Tenebrionidae	Hymenorus	Hymenorus sp.		California	United States	Algodones Dunes						117	YPT
Coleoptera	91948	Coleoptera	Tenebrionidae	Hymenorus	Hymenorus sp.		California	United States	Algodones Dunes						118	Malaise
Coleoptera	91949	Coleoptera	Tenebrionidae	Hymenorus	Hymenorus sp.		California	United States	Algodones Dunes						120	Malaise
Coleoptera	91950	Coleoptera	Tenebrionidae	Hymenorus	Hymenorus sp.		California	United States	Algodones Dunes						125	Malaise
Coleoptera	91951	Coleoptera	Tenebrionidae	Hymenorus	Hymenorus sp.		California	United States	Algodones Dunes						126	Malaise
Coleoptera	91952	Coleoptera	Tenebrionidae	Mecysmus	Mecysmus angustus		California	United States	Algodones Dunes						005	UV Trap
Coleoptera	91953	Coleoptera	Tenebrionidae	Mecysmus	Mecysmus angustus		California	United States	Algodones Dunes						061	By net
Coleoptera	91954	Coleoptera	Tenebrionidae	Mecysmus	Mecysmus angustus		California	United States	Algodones Dunes						062	UV Trap
Coleoptera	91955	Coleoptera	Tenebrionidae	Mecysmus	Mecysmus angustus		California	United States	Algodones Dunes						069	By net					Psorothamnus spinosus
Coleoptera	91956	Coleoptera	Tenebrionidae	Metoponium	Metoponium sp.		California	United States	Algodones Dunes						002	YPT
Coleoptera	91957	Coleoptera	Tenebrionidae	Metoponium	Metoponium sp.		California	United States	Algodones Dunes						003	Black light
Coleoptera	91958	Coleoptera	Tenebrionidae	Metoponium	Metoponium sp.		California	United States	Algodones Dunes						005	Pitfall
Coleoptera	91959	Coleoptera	Tenebrionidae	Metoponium	Metoponium sp.		California	United States	Algodones Dunes						005	UV Trap
Coleoptera	91960	Coleoptera	Tenebrionidae	Metoponium	Metoponium sp.		California	United States	Algodones Dunes						005	YPT
Coleoptera	91961	Coleoptera	Tenebrionidae	Metoponium	Metoponium sp.		California	United States	Algodones Dunes						007	Pitfall
Coleoptera	91962	Coleoptera	Tenebrionidae	Metoponium	Metoponium sp.		California	United States	Algodones Dunes						008	Malaise
Coleoptera	91963	Coleoptera	Tenebrionidae	Metoponium	Metoponium sp.		California	United States	Algodones Dunes						021	Pitfall
Coleoptera	91964	Coleoptera	Tenebrionidae	Metoponium	Metoponium sp.		California	United States	Algodones Dunes						033	Light trap
Coleoptera	91965	Coleoptera	Tenebrionidae	Metoponium	Metoponium sp.		California	United States	Algodones Dunes						060	Malaise
Coleoptera	91966	Coleoptera	Tenebrionidae	Metoponium	Metoponium sp.		California	United States	Algodones Dunes						065	Black light
Coleoptera	91967	Coleoptera	Tenebrionidae	Metoponium	Metoponium sp.		California	United States	Algodones Dunes						070	Mercury Vapor
Coleoptera	91968	Coleoptera	Tenebrionidae	Metoponium	Metoponium sp.		California	United States	Algodones Dunes						091	Malaise
Coleoptera	91969	Coleoptera	Tenebrionidae	Metoponium	Metoponium sp.		California	United States	Algodones Dunes						094	Malaise
Coleoptera	91970	Coleoptera	Tenebrionidae	Metoponium	Metoponium sp.		California	United States	Algodones Dunes						094	UV Trap
Coleoptera	91971	Coleoptera	Tenebrionidae	Metoponium	Metoponium sp.		California	United States	Algodones Dunes						116	by net
Coleoptera	91972	Coleoptera	Tenebrionidae	Metoponium	Metoponium sp.		California	United States	Algodones Dunes						125	Malaise
Coleoptera	91973	Coleoptera	Tenebrionidae	Nocibiotes	Nocibiotes crassipes		California	United States	Algodones Dunes						030	Pitfall					Larrea
Coleoptera	91974	Coleoptera	Tenebrionidae	Nocibiotes	Nocibiotes crassipes		California	United States	Algodones Dunes						052	Pitfall/YPT
Coleoptera	91975	Coleoptera	Tenebrionidae	Nocibiotes	Nocibiotes granulatus		California	United States	Algodones Dunes						003	YPT
Coleoptera	91976	Coleoptera	Tenebrionidae	Nocibiotes	Nocibiotes granulatus		California	United States	Algodones Dunes						030	Pitfall
Coleoptera	91977	Coleoptera	Tenebrionidae	Nocibiotes	Nocibiotes granulatus		California	United States	Algodones Dunes						031	Pitfall
Coleoptera	91978	Coleoptera	Tenebrionidae	Nocibiotes	Nocibiotes granulatus		California	United States	Algodones Dunes						052	Pitfall/ YPT
Coleoptera	91979	Coleoptera	Tenebrionidae	Nocibiotes	Nocibiotes granulatus		California	United States	Algodones Dunes						059	Malaise
Coleoptera	91980	Coleoptera	Tenebrionidae	Nocibiotes	Nocibiotes granulatus		California	United States	Algodones Dunes						062	Pitfall
Coleoptera	91981	Coleoptera	Tenebrionidae	Nocibiotes	Nocibiotes granulatus		California	United States	Algodones Dunes						063	Pitfall
Coleoptera	91982	Coleoptera	Tenebrionidae	Notibius	Notibius laticeps		California	United States	Algodones Dunes						005	Pitfall
Coleoptera	91983	Coleoptera	Tenebrionidae	Notibius	Notibius laticeps		California	United States	Algodones Dunes						005	YPT
Coleoptera	91984	Coleoptera	Tenebrionidae	Notibius	Notibius laticeps		California	United States	Algodones Dunes						008	Pitfall
Coleoptera	91985	Coleoptera	Tenebrionidae	Notibius	Notibius laticeps		California	United States	Algodones Dunes						030	Pitfall
Coleoptera	91986	Coleoptera	Tenebrionidae	Notibius	Notibius laticeps		California	United States	Algodones Dunes						031	Pitfall
Coleoptera	91987	Coleoptera	Tenebrionidae	Notibius	Notibius laticeps		California	United States	Algodones Dunes						032	Pitfall
Coleoptera	91988	Coleoptera	Tenebrionidae	Notibius	Notibius laticeps		California	United States	Algodones Dunes						033	Pitfall
Coleoptera	91989	Coleoptera	Tenebrionidae	Notibius	Notibius laticeps		California	United States	Algodones Dunes						034	YPT
Coleoptera	91990	Coleoptera	Tenebrionidae	Notibius	Notibius laticeps		California	United States	Algodones Dunes						039	By net					Prosopis
Coleoptera	91991	Coleoptera	Tenebrionidae	Notibius	Notibius laticeps		California	United States	Algodones Dunes						052	Pitfall
Coleoptera	91992	Coleoptera	Tenebrionidae	Notibius	Notibius laticeps		California	United States	Algodones Dunes						053	Pitfall
Coleoptera	91993	Coleoptera	Tenebrionidae	Notibius	Notibius laticeps		California	United States	Algodones Dunes						062	Pitfall
Coleoptera	91994	Coleoptera	Tenebrionidae	Notibius	Notibius laticeps		California	United States	Algodones Dunes						063	Pitfall
Coleoptera	91995	Coleoptera	Tenebrionidae	Telabis	Telabis serrata		California	United States	Algodones Dunes						005	Black light
Coleoptera	91996	Coleoptera	Tenebrionidae	Telabis	Telabis serrata		California	United States	Algodones Dunes						005	Malaise
Coleoptera	91997	Coleoptera	Tenebrionidae	Telabis	Telabis serrata		California	United States	Algodones Dunes						005	Pitfall
Coleoptera	91998	Coleoptera	Tenebrionidae	Telabis	Telabis serrata		California	United States	Algodones Dunes						005	UV Trap
Coleoptera	91999	Coleoptera	Tenebrionidae	Telabis	Telabis serrata		California	United States	Algodones Dunes						005	YPT
Coleoptera	92000	Coleoptera	Tenebrionidae	Telabis	Telabis serrata		California	United States	Algodones Dunes						061	Sweep					Psorothamnus
Coleoptera	92001	Coleoptera	Tenebrionidae	Telabis	Telabis serrata		California	United States	Algodones Dunes						064	Light trap
Coleoptera	92002	Coleoptera	Tenebrionidae	Telabis	Telabis serrata		California	United States	Algodones Dunes						067	Malaise
Coleoptera	92003	Coleoptera	Tenebrionidae	Telabis	Telabis serrata		California	United States	Algodones Dunes						069	By net					Psorothamnus spinosus
Coleoptera	92004	Coleoptera	Tenebrionidae	Telabis	Telabis serrata		California	United States	Algodones Dunes						113	Black light
Coleoptera	92005	Coleoptera	Tenebrionidae	Telabis	Telabis serrata		California	United States	Algodones Dunes						120	Malaise
Coleoptera	92006	Coleoptera	Tenebrionidae	Tonibius	Tonibius sulcatus		California	United States	Algodones Dunes						031	Pitfall
Coleoptera	92007	Coleoptera	Tenebrionidae	Triorophus	Triorophus laevis		California	United States	Algodones Dunes						031	Pitfall
Coleoptera	92008	Coleoptera	Tenebrionidae	Triorophus	Triorophus laevis		California	United States	Algodones Dunes						032	Pitfall
Coleoptera	92009	Coleoptera	Tenebrionidae	Triorophus	Triorophus laevis		California	United States	Algodones Dunes						062	Pitfall
Coleoptera	92010	Coleoptera	Tenebrionidae	Ulus	Ulus crassus		California	United States	Algodones Dunes						003	Pitfall
Coleoptera	92011	Coleoptera	Tenebrionidae	Ulus	Ulus crassus		California	United States	Algodones Dunes						005	Black light
Coleoptera	92012	Coleoptera	Tenebrionidae	Ulus	Ulus crassus		California	United States	Algodones Dunes						005	UV trap
Coleoptera	92013	Coleoptera	Tenebrionidae	Ulus	Ulus crassus		California	United States	Algodones Dunes						005	Pitfall
Coleoptera	92014	Coleoptera	Tenebrionidae	Ulus	Ulus crassus		California	United States	Algodones Dunes						005	YPT
Coleoptera	92015	Coleoptera	Tenebrionidae	Ulus	Ulus crassus		California	United States	Algodones Dunes						006	UV trap
Coleoptera	92016	Coleoptera	Tenebrionidae	Ulus	Ulus crassus		California	United States	Algodones Dunes						039	UV trap
Coleoptera	92017	Coleoptera	Tenebrionidae	Eusattus	Eusattus ventricosus		California	United States	Algodones Dunes
Coleoptera	92018	Coleoptera	Tenebrionidae	Hymenorus	Hymenorus sp. 2		California	United States	Algodones Dunes
Coleoptera	92020	Coleoptera	Tenebrionidae	Paratenetus	Paratenetus sp.		California	United States	Algodones Dunes
