# Supplementary material for: An updated checklist of the Tenebrionidae sec. Bousquet et al. 2018 of the Algodones Dunes of California, with comments on checklist data practices
Source: Biodivers Data J. 2018 Jun 14;(6):e24927. doi: 10.3897/BDJ.6.e24927 (PMC6013544; doi:10.3897/BDJ.6.e24927)
Supplement: Supplementary material 5 — SCAN occurrences for the Lower Colorado River Valley [file bdj-06-e24927-s005.csv]

catalogNumber	scientificName	decimalLatitude	decimalLongitude	Notes
UAIC1053710	Araeoschizus hardyi	33.961406	-114.723576	accepted
UAIC1053711	Araeoschizus hardyi	33.961406	-114.723576	accepted
UAIC1053712	Araeoschizus hardyi	32.997542	-115.071916	accepted
OSUC 654941	Araeoschizus hardyi	33.7667	-116.3592	accepted
OSUC 654942	Araeoschizus hardyi	33.7667	-116.3592	accepted
OSUC 654943	Araeoschizus hardyi	33.7667	-116.3592	accepted
OSUC 654944	Araeoschizus hardyi	33.7667	-116.3592	accepted
OSUC 654945	Araeoschizus hardyi	33.7667	-116.3592	accepted
SBMNHENT0069042	Araeoschizus hardyi	33.0175	-115.1046	accepted
SBMNHENT0069054	Araeoschizus hardyi	33.0175	-115.1046	accepted
UAIC1053821	Batulius setosus	32.486905	-114.62734	accepted
UAIC1053822	Batulius setosus	32.486905	-114.62734	accepted
UAIC1053823	Batulius setosus	32.486905	-114.62734	accepted
UAIC1053824	Batulius setosus	32.486905	-114.62734	accepted
UAIC1053825	Batulius setosus	32.486905	-114.62734	accepted
UAIC1053826	Batulius setosus	32.486905	-114.62734	accepted
UAIC1053827	Batulius setosus	32.486905	-114.62734	accepted
UAIC1053828	Batulius setosus	32.486905	-114.62734	accepted
UAIC1053829	Batulius setosus	32.486905	-114.62734	accepted
UAIC1053830	Batulius setosus	32.486905	-114.62734	accepted
UAIC1053831	Batulius setosus	32.486905	-114.62734	accepted
UAIC1053832	Batulius setosus	32.486905	-114.62734	accepted
UAIC1053833	Batulius setosus	32.486905	-114.62734	accepted
UAIC1053834	Batulius setosus	32.486905	-114.62734	accepted
UAIC1053835	Batulius setosus	32.486905	-114.62734	accepted
UAIC1053836	Batulius setosus	32.486905	-114.62734	accepted
BYUC064502	Batulius setosus	33.640301	-116.139448	accepted
MAJCTC01028	Batulius setosus	33.9935	-114.1033	accepted
MAJC0003716	Batulius setosus	32.839	-114.369	accepted
MAJC0003717	Batulius setosus	32.839	-114.369	accepted
MAJC0003718	Batulius setosus	32.839	-114.369	accepted
MAJC0003719	Batulius setosus	32.839	-114.369	accepted
MAJC0003720	Batulius setosus	32.795	-113.542	accepted
MAJC0003721	Batulius setosus	34.3943	-115.4227	accepted
MAJC0003722	Batulius setosus	33.9935	-114.1033	accepted
MAJC0003723	Batulius setosus	33.9935	-114.1033	accepted
SBMNHENT0067874	Batulius setosus	33.2583	-116.2933	accepted
SBMNHENT0067875	Batulius setosus	33.2583	-116.2933	accepted
KKIC0000026	Batulius setosus	32.99245	-115.079933	accepted
KKIC0000027	Batulius setosus	32.922	-114.9778	accepted
ASUHIC0040023	Edrotes arens	32.756784	-114.817031	accepted
ASUHIC0040024	Edrotes arens	32.756784	-114.817031	accepted
ASUHIC0040025	Edrotes arens	32.756784	-114.817031	accepted
NAUF4A0002846	Edrotes arens	33.100048	-115.193452	accepted
CSU ENT0005065	Edrotes arens	32.64186	-113.71943	accepted
CSU ENT0005066	Edrotes arens	32.757482	-114.85358	accepted
X1026027	Edrotes arens	32.7601	-114.8373	accepted
UAIC1059559	Edrotes arens	34.150016	-114.289118	accepted
UAIC1059560	Edrotes arens	34.150016	-114.289118	accepted
UAIC1059561	Edrotes arens	32.87911	-114.441438	accepted
UAIC1059562	Edrotes arens	32.725325	-114.624397	accepted
UAIC1059563	Edrotes arens	32.878535	-114.765592	accepted
UAIC1059564	Edrotes arens	32.486905	-114.62734	accepted
UAIC1059565	Edrotes arens	32.81696	-114.925186	accepted
UAIC1059566	Edrotes arens	32.81696	-114.925186	accepted
UAIC1059567	Edrotes arens	32.725325	-114.624397	accepted
UAIC1059568	Edrotes arens	32.486905	-114.62734	accepted
UAIC1059569	Edrotes arens	32.87911	-114.441438	accepted
UAIC1059570	Edrotes arens	32.81696	-114.925186	accepted
UAIC1059571	Edrotes arens	33.932524	-114.005775	accepted
UAIC1059572	Edrotes arens	32.697429	-113.7811	accepted
BYUC059712	Edrotes arens	32.72528	-114.62361	accepted
BYUC059873	Edrotes arens	32.72528	-114.62361	accepted
BYUC057530	Edrotes arens	32.72528	-114.62361	accepted
BYUC059928	Edrotes arens	32.72528	-114.62361	accepted
BYUC059714	Edrotes arens	32.785411	-114.797182	accepted
BYUC059871	Edrotes arens	32.785411	-114.797182	accepted
BYUC059760	Edrotes arens	32.785411	-114.797182	accepted
BYUC060077	Edrotes arens	32.785411	-114.797182	accepted
BYUC057325	Edrotes arens	32.785411	-114.797182	accepted
BYUC057277	Edrotes arens	32.785411	-114.797182	accepted
BYUC057427	Edrotes arens	32.785411	-114.797182	accepted
BYUC057432	Edrotes arens	32.785411	-114.797182	accepted
BYUC057482	Edrotes arens	32.785411	-114.797182	accepted
8294150	Edrotes arens	32.7363	-114.893	accepted
8294149	Edrotes arens	33.0242	-115.1116	accepted
8294148	Edrotes arens	33.0242	-115.1116	accepted
8294147	Edrotes arens	33.0242	-115.1116	accepted
8294146	Edrotes arens	33.0242	-115.1116	accepted
8294145	Edrotes arens	33.0242	-115.1116	accepted
8294144	Edrotes arens	33.0242	-115.1116	accepted
8294143	Edrotes arens	33.0242	-115.1116	accepted
8294142	Edrotes arens	33.0242	-115.1116	accepted
8294141	Edrotes arens	33.0242	-115.1116	accepted
8294140	Edrotes arens	33.0242	-115.1116	accepted
8294139	Edrotes arens	33.0242	-115.1116	accepted
8294138	Edrotes arens	33.0242	-115.1116	accepted
8294137	Edrotes arens	33.0242	-115.1116	accepted
8294136	Edrotes arens	33.0674	-115.2811	accepted
8294135	Edrotes arens	33.0674	-115.2811	accepted
8294134	Edrotes arens	33.1413	-115.0892	accepted
8294133	Edrotes arens	33.1413	-115.0892	accepted
8294132	Edrotes arens	33.1413	-115.0892	accepted
8294131	Edrotes arens	33.1413	-115.0892	accepted
8294130	Edrotes arens	33.1413	-115.0892	accepted
8294129	Edrotes arens	33.1413	-115.0892	accepted
8294128	Edrotes arens	33.1413	-115.0892	accepted
8294127	Edrotes arens	33.1413	-115.0892	accepted
8294126	Edrotes arens	33.1413	-115.0892	accepted
8294125	Edrotes arens	33.1413	-115.0892	accepted
8294124	Edrotes arens	33.1413	-115.0892	accepted
8294123	Edrotes arens	33.1413	-115.0892	accepted
8294122	Edrotes arens	33.1413	-115.0892	accepted
8294121	Edrotes arens	33.1413	-115.0892	accepted
8294120	Edrotes arens	33.0694	-115.0805	accepted
8294119	Edrotes arens	33.1117	-115.0793	accepted
8294118	Edrotes arens	33.1117	-115.0793	accepted
8294117	Edrotes arens	33.1117	-115.0793	accepted
8294116	Edrotes arens	32.8893	-115.07	accepted
8294115	Edrotes arens	32.8893	-115.07	accepted
8294114	Edrotes arens	32.8893	-115.07	accepted
8294113	Edrotes arens	32.8893	-115.07	accepted
8294112	Edrotes arens	32.9851	-115.1183	accepted
8294111	Edrotes arens	32.9851	-115.1183	accepted
8294110	Edrotes arens	32.9851	-115.1183	accepted
8294109	Edrotes arens	32.9851	-115.1183	accepted
8294108	Edrotes arens	32.9851	-115.1183	accepted
8294107	Edrotes arens	32.9851	-115.1183	accepted
8294106	Edrotes arens	32.9851	-115.1183	accepted
8294105	Edrotes arens	32.9851	-115.1183	accepted
8294104	Edrotes arens	32.9851	-115.1183	accepted
8294103	Edrotes arens	32.9851	-115.1183	accepted
8294102	Edrotes arens	32.9851	-115.1183	accepted
8294101	Edrotes arens	32.9851	-115.1183	accepted
8294100	Edrotes arens	32.9851	-115.1183	accepted
8294099	Edrotes arens	32.7898	-114.8591	accepted
8294098	Edrotes arens	32.7898	-114.8591	accepted
8294097	Edrotes arens	32.7898	-114.8591	accepted
8294096	Edrotes arens	32.7898	-114.8591	accepted
8294095	Edrotes arens	32.7898	-114.8591	accepted
8294094	Edrotes arens	32.7898	-114.8591	accepted
8294093	Edrotes arens	32.7422	-114.8475	accepted
8294092	Edrotes arens	32.5806	-114.8076	accepted
8294091	Edrotes arens	32.5806	-114.8076	accepted
8294090	Edrotes arens	32.5806	-114.8076	accepted
8294089	Edrotes arens	32.5806	-114.8076	accepted
8294088	Edrotes arens	32.5806	-114.8076	accepted
8294087	Edrotes arens	32.5806	-114.8076	accepted
8294086	Edrotes arens	32.5806	-114.8076	accepted
MAJCTC00790	Edrotes arens	32.6948	-113.8035	accepted
MAJCTC00850	Edrotes arens	33.605	-114.902	accepted
MAJCTC00851	Edrotes arens	33.605	-114.902	accepted
MAJC0003796	Edrotes arens	32.997542	-115.071916	accepted
MAJC0003797	Edrotes arens	32.997542	-115.071916	accepted
MAJC0003798	Edrotes arens	32.6948	-113.8035	accepted
MAJC0003799	Edrotes arens	32.6948	-113.8035	accepted
MAJC0003800	Edrotes arens	33.605	-114.902	accepted
MAJC0003801	Edrotes arens	33.605	-114.902	accepted
MAJC0003802	Edrotes arens	33.605	-114.902	accepted
MAJC0003803	Edrotes arens	33.605	-114.902	accepted
MAJC0003804	Edrotes arens	33.605	-114.902	accepted
MAJC0003805	Edrotes arens	33.605	-114.902	accepted
MAJC0003806	Edrotes arens	33.605	-114.902	accepted
MAJC0003807	Edrotes arens	33.605	-114.902	accepted
MAJC0003808	Edrotes arens	32.6948	-113.8035	accepted
SBMNHENT0069047	Edrotes arens	33.0175	-115.1046	accepted
SBMNHENT0069918	Edrotes arens	32.7428	-115.1981	accepted
3394594	Edrotes arens	32.925036	-114.991764	accepted
NAUF4A0002851	Embaphion depressum	32.9975	-115.07111	accepted
NAUF4A0002852	Embaphion depressum	33.61222	-114.99472	accepted
X1014056	Embaphion depressum	32.99754	-115.07192	accepted
X1014811	Embaphion depressum	32.99754	-115.07192	accepted
UAIC1063910	Embaphion depressum	32.72528	-114.62361	accepted
UAIC1063911	Embaphion depressum	32.72528	-114.62361	accepted
UAIC1063912	Embaphion depressum	31.858198	-113.791166	accepted
UAIC1063913	Embaphion depressum	31.858198	-113.791166	accepted
UAIC1063914	Embaphion depressum	32.486905	-114.62734	accepted
UAIC1063915	Embaphion depressum	32.486905	-114.62734	accepted
UAIC1063916	Embaphion depressum	32.878535	-114.765592	accepted
UAIC1063917	Embaphion depressum	32.878535	-114.765592	accepted
UAIC1063918	Embaphion depressum	32.878535	-114.765592	accepted
UAIC1063919	Embaphion depressum	31.858198	-113.791166	accepted
OSUC 452826	Embaphion depressum	32.8172	-114.8906	accepted
MAJC0002048	Embaphion depressum	33.003	-115.081	accepted
MAJC0002049	Embaphion depressum	33.003	-115.081	accepted
MAJC0002050	Embaphion depressum	32.649	-114.444	accepted
SBMNHENT0069903	Embaphion depressum	33.1472	-115.3236	accepted
SBMNHENT0069904	Embaphion depressum	33.1472	-115.3236	accepted
3394749	Embaphion depressum	32.924999	-114.991739	accepted
BYUC075751	Eupsophulus horni	28.692364	-112.580029	accepted
UAIC1057398	Eusattus dilatatus	33.61028	-114.59556	accepted
UAIC1057399	Eusattus dilatatus	33.61028	-114.59556	accepted
UAIC1057402	Eusattus dilatatus	31.858198	-113.791166	accepted
UAIC1057404	Eusattus dilatatus	31.858198	-113.791166	accepted
UAIC1057405	Eusattus dilatatus	31.858198	-113.791166	accepted
UAIC1057406	Eusattus dilatatus	31.858198	-113.791166	accepted
UAIC1057407	Eusattus dilatatus	31.858198	-113.791166	accepted
UAIC1057408	Eusattus dilatatus	32.725325	-114.624397	accepted
UAIC1057409	Eusattus dilatatus	32.615503	-114.469215	accepted
UAIC1057410	Eusattus dilatatus	32.642104	-114.476082	accepted
UAIC1057411	Eusattus dilatatus	31.858198	-113.791166	accepted
UAIC1057412	Eusattus dilatatus	31.858198	-113.791166	accepted
UAIC1057413	Eusattus dilatatus	32.997542	-115.071916	accepted
UAIC1057414	Eusattus dilatatus	32.816979	-114.890652	accepted
UAIC1057415	Eusattus dilatatus	32.997542	-115.071916	accepted
UAIC1057416	Eusattus dilatatus	32.87911	-114.441438	accepted
UAIC1057417	Eusattus dilatatus	32.997542	-115.071916	accepted
UAIC1057418	Eusattus dilatatus	32.051812	-114.20552	accepted
BYUC075915	Eusattus dilatatus	32.795801	-114.950991	accepted
MAJC0003811	Eusattus dilatatus	32.9733	-115.1781	accepted
SBMNHENT0069034	Eusattus dilatatus	33.0175	-115.1046	accepted
SBMNHENT0069038	Eusattus dilatatus	33.0175	-115.1046	accepted
SBMNHENT0069923	Eusattus dilatatus	32.7428	-115.1981	accepted
KKIC0000217	Eusattus dilatatus	32.99245	-115.066667	accepted
KKIC0000218	Eusattus dilatatus	32.99245	-115.066667	accepted
KKIC0000219	Eusattus dilatatus	32.99245	-115.066667	accepted
KKIC0000220	Eusattus dilatatus	32.99245	-115.066667	accepted
KKIC0000221	Eusattus dilatatus	32.99245	-115.066667	accepted
KKIC0000222	Eusattus dilatatus	32.99245	-115.066667	accepted
KKIC0000223	Eusattus dilatatus	32.99245	-115.066667	accepted
KKIC0000224	Eusattus dilatatus	32.99245	-115.079933	accepted
KKIC0000225	Eusattus dilatatus	32.99245	-115.079933	accepted
KKIC0000226	Eusattus dilatatus	32.99245	-115.079933	accepted
ASUHIC0040342	Eusattus productus	31.316667	-113.533333	accepted
ASUHIC0040343	Eusattus productus	31.316667	-113.533333	accepted
ASUHIC0040344	Eusattus productus	32.72528	-114.62361	accepted
UAIC1057504	Eusattus productus	32.725325	-114.624397	accepted
UAIC1057505	Eusattus productus	32.72528	-114.62361	accepted
UAIC1057506	Eusattus productus	32.72528	-114.62361	accepted
UAIC1057507	Eusattus productus	30.792709	-112.23239	accepted
UAIC1057508	Eusattus productus	32.486905	-114.62734	accepted
UAIC1057509	Eusattus productus	32.486905	-114.62734	accepted
UAIC1057510	Eusattus productus	32.486905	-114.62734	accepted
MAJC0003812	Eusattus productus	32.9733	-115.1781	accepted
MAJC0003813	Eusattus productus	32.795	-113.542	accepted
UAIC1067489	Hymenorus thoracicus	31.333333	-113.633333	accepted
UAIC1067490	Hymenorus thoracicus	33.44833	-112.07333	accepted
UAIC1067491	Hymenorus thoracicus	33.44833	-112.07333	accepted
UAIC1067492	Hymenorus thoracicus	33.44833	-112.07333	accepted
UAIC1067493	Hymenorus thoracicus	33.60417	-114.52444	accepted
UAIC1067494	Hymenorus thoracicus	33.60417	-114.52444	accepted
UAIC1067495	Hymenorus thoracicus	33.44833	-112.07333	accepted
BYUC078022	Hymenorus thoracicus	32.22167	-110.92583	accepted
X1065710	Mycotrogus angustus	33.96864	-112.72962	accepted
NAUF4A0002612	Eusattus productus	26.934476	-108.841108	mis-label? Mis-ID?
ASUHIC0040341	Eusattus productus	33.850169	-111.310619	mis-label?
527478	Mycotrogus angustus	34.180738	-111.532715	AZ Centroid
7214	Mycotrogus angustus	34.180738	-111.532715	AZ Centroid
527477	Mycotrogus angustus	34.180738	-111.532715	AZ Centroid
527479	Mycotrogus angustus	34.180738	-111.532715	AZ Centroid
BYUC076166	Eusattus dilatatus	36.104372	-112.11599	mis-id? Likely E. muricatus
BYUC076017	Eusattus dilatatus	38.39694	-113.01	mis-id? Likely E. muricatus
BYUC075994	Eusattus dilatatus	38.39694	-113.01	mis-id? Likely E. muricatus
BYUC075649	Eusattus dilatatus	38.39694	-113.01	mis-id? Likely E. muricatus
BYUC075616	Eusattus dilatatus	38.39694	-113.01	mis-id? Likely E. muricatus
BYUC075796	Eusattus dilatatus	36.66051	-115.994475	mis-id? Likely E. muricatus
BYUC075755	Eusattus dilatatus	36.66051	-115.994475	mis-id? Likely E. muricatus
BYUC075734	Eusattus dilatatus	36.66051	-115.994475	mis-id? Likely E. muricatus
BYUC075603	Eusattus dilatatus	36.66051	-115.994475	mis-id? Likely E. muricatus
BYUC075953	Eusattus dilatatus	36.66051	-115.994475	mis-id? Likely E. muricatus
BYUC076037	Eusattus dilatatus	36.66051	-115.994475	mis-id? Likely E. muricatus
BYUC075931	Eusattus dilatatus	36.66051	-115.994475	mis-id? Likely E. muricatus
BYUC075742	Eusattus dilatatus	36.66051	-115.994475	mis-id? Likely E. muricatus
BYUC076018	Eusattus dilatatus	36.66051	-115.994475	mis-id? Likely E. muricatus
BYUC075660	Eusattus dilatatus	39.954839	-112.118901	mis-id? Likely E. muricatus
4623	Embaphion depressum	37.213544	-119.59668	CA centroid
4501	Batulius setosus	37.213544	-119.59668	CA centroid
NAUF4A0002850	Embaphion depressum	26.033333	-111.216667	Bad georeferencing - Northern Sonora not Baja Sur
UAIC1063909	Embaphion depressum	35.521722	-115.316101	imprecise georeferencing (old label)
