# Supplementary material for: An updated checklist of the Tenebrionidae sec. Bousquet et al. 2018 of the Algodones Dunes of California, with comments on checklist data practices
Source: Biodivers Data J. 2018 Jun 14;(6):e24927. doi: 10.3897/BDJ.6.e24927 (PMC6013544; doi:10.3897/BDJ.6.e24927)
Supplement: Supplementary material 6 — Interpretation of species lists from biodiversity aggregators [file bdj-06-e24927-s006.xlsx]

## Sheet: SCAN
Raw Taxon Name	Interpretted	Valid Taxonomic Occurrence	Number of Records
Anepsius delicatulus	Anepsius delicatulus	Yes	3
Araeoschizus andrewsi	Araeoschizus andrewsi	Yes	37
Araeoschizus hardyi	Araeoschizus hardyi	Yes	3
Araeoschizus wasbauerorum	Araeoschizus wasbauerorum	Yes	1
Asbolus laevis	Asbolus laevis	Yes	108
Asbolus papillosus	Asbolus papillosus	Yes	5
Asbolus verrucosus	Asbolus verrucosus	Yes	26
Batuliomorpha imperialis	Batuliomorpha imperialis	Yes	6
Batulius setosus	Batulius setosus	Yes	2
Blapstinus histricus	Blapstinus histricus	Yes	2
Cerenopus concolor	Cerenopus concolor	Yes	10
Chilometopon abnorme	Chilometopon abnorme	Yes	7
Chilometopon pallidum	Chilometopon pallidum	Yes	19
Cnemeplatia new	Lepidocnemeplatia n. sp.	Yes	3
Cnemodinus testaceus	Cnemodinus testaceus	Yes	43
Cryptoglossa muricata	Cryptoglossa muricata	Yes	2
Edrotes arens	Edrotes arens	Yes	53
Edrotes ventricosus	Edroted ventricosus	Yes	51
Eleodes armata	Eleodes armata	Yes	5
Embaphion depressum	Embaphion depressum	Yes	8
Eupsophulus castaneus	Eupsophulus castaneus	Yes	15
Eusattus dilatatus	Eusattus dilatatus	Yes	19
Eusattus productus	Eusattus productus	Yes	1
Lepidocnemeplatia sericea	Lepidocnemeplatia sericea	Yes	7
Mecysmus angustus	Mecysmus angustus	Yes	1
Notibius puberulus	Notibius puberulus	Yes	2
Stenomorpha confluens	Stenomorpha confluens	Yes	9
Stenomorpha hirsuta	Stenomorpha hirsuta	Yes	2
Telabis serrata	Telabis serrata	Yes	3
Triorophus laevis	Triorophus laevis	Yes	1
Asbolus laevis laevis	Asbolus laevis	No - Synonym	1
Asidina confluens	Stenomorpha confluens	No - Synonym	6
Centrioptera muricata	Cryptoglossa muricata	No - Synonym	16
Cryptoglossa laevis	Asbolus laevis	No - Synonym	13
Cryptoglossa laevis laevis	Asbolus laevis	No - Synonym	11
Cryptoglossa laevis papillosa	Asbolus papillosus	No - Synonym	1
Cryptoglossa verrucosus	Asbolus verrucosus	No - Synonym	8
Eusattus fortineri	Eusattus dilatatus	No - Synonym	3
Notibius laticeps	Notibius puberulus	No - Synonym	4
Araeoschizus costipennis	Araeoschizus costipennis	No - probable misidentification	2
Conibius gagates	Conibius gagates	No - probable misidentification	4
Leptohoplia	Leptohoplia	No - coarse Identification, not Tenebrionidae	5
Argoporis	Argoporis	No - non-dune-record	1
Chilometapon	Chilometopon	No - Misspelling	2
Edrotes arenis	Edrotes arens	No - Misspelling	2
Eleodes (Eleodes) amatus	Eleodes armata	No - Misspelling	5
Eleodes armatus	Eleodes armata	No - Misspelling	32
Eleodes Eleodes armatus	Eleodes armata	No - Misspelling	2
Eusophulus castaneus	Eupsophulus castaneus	No - Misspelling	1
Telabis spp.	Telabis	No - Misspelling	4
Anemia	Cheirodes	No - coarse ID	1
Anepsiini	Anepsiini	No - coarse ID	4
Batuliodes	Batuliodes	No - coarse ID	3
Batulius	Batulius	No - coarse ID	3
Chilometopon	Chilometopon	No - coarse ID	2
Cnemodinus	Cnemodinus	No - coarse ID	3
Cryptoglossa	Cryptoglossa	No - coarse ID	1
Edrotes	Edrotes	No - coarse ID	30
Eleodes	Eleodes	No - coarse ID	1
Eusattus	Eusattus	No - coarse ID	1
Notibius	Notibius	No - coarse ID	1
Pimeliinae	Pimeliinae	No - coarse ID	2
Telabis	Telabis	No - coarse ID	5
Tenebrionidae	Tenebrionidae	No - coarse ID	58
Triorophus	Triorophus	No - coarse ID	1
			693

## Sheet: iDB
Raw Taxon Name	Interpretted	Valid Taxonomic Occurrence	Num Records
anepsius delicatulus	Anepsius delicatulus	Yes	3
araeoschizus andrewsi	Araeoschizus andrewsi	Yes	22
araeoschizus hardyi	Araeoschizus hardyi	Yes	3
araeoschizus wasbauerorum	Araeoschizus wasbauerorum	Yes	1
asbolus laevis	Asbolus laevis	Yes	35
asbolus verrucosus	Asbolus verrucosus	Yes	13
batuliomorpha imperialis	Batuliomorpha imperialis	Yes	6
blapstinus histricus	Blapstinus histricus	Yes	1
cerenopus concolor	Cerenopus concolor	Yes	10
chilometopon abnorme	Chilometopon abnorme	Yes	6
chilometopon pallidum	Chilometopon pallidum	Yes	16
cnemodinus testaceus	Cnemodinus testaceus	Yes	1
cryptoglossa muricata	Cryptoglossa muricata	Yes	1
edrotes arens	Edrotes arens	Yes	21
edrotes ventricosus	Edrotes ventricosus	Yes	23
eleodes armata	Eleodes armata	Yes	5
embaphion depressum	Embaphion depressum	Yes	11
eupsophulus castaneus	Eupsophulus castaneus	Yes	13
eusattus dilatatus	Eusattus dilatatus	Yes	8
cnemeplatia new	Lepidocnemeplatia n.sp.	Yes	3
notibius puberulus	Notibius puberulus	Yes	4
asidina confluens	Stenomorpha confluens	Yes	6
trichiasida hirsuta	Stenomorpha hirsuta	Yes	1
telabis serrata	Telabis serrata	Yes	1
triorophus politus	Triorophus politus	Yes	1
cryptoglossa verrucosus	Asbolus laevis	No - Synonym	8
cryptoglossa laevis	Asbolus laevis	No - Synonym	8
asbolus laevis laevis	Asbolus laevis	No - Synonym	1
centrioptera muricata	Cryptoglossa muricata	No - Synonym	16
eusattus fortineri	Eusattus dilatatus	No - Synonym	3
notibius laticeps	Notibius puberulus	No - Synonym	4
araeoschizus costipennis	Araeoschizus costipennis	No - probable misidentification	2
conibius gagates	Conibius gagates	No - probable misidentification	4
leptohoplia	Leptohoplia	No - not Tenebrionidae	5
zopherus tristis	Zopherus tristis	No - not Tenebrionidae	1
argoporis	Argoporis	No - non-dune-record	1
chilometapon	Chilometopon	No - Misspelling	2
edrotes arenis	Edrotes arens	No - Misspelling	2
eleodes eleodes armatus	Eleodes armata	No - Misspelling	85
eleodes armatus	Eleodes armata	No - Misspelling	32
eleodes (eleodes) amatus	Eleodes armata	No - Misspelling	20
eusophulus castaneus	Eupsophulus castaneus	No - Misspelling	1
telabis spp.	Telabis	No - Misspelling	4
batuliodes	Batuliodes	No - coarse ID	3
batulius	Batulius	No - coarse ID	3
anemia	Cheirodes	No - coarse ID	1
chilometopon	Chilometopon	No - coarse ID	1
cnemodinus	Cnemodinus	No - coarse ID	3
cryptoglossa	Cryptoglossa	No - coarse ID	1
edrotes	Edrotes	No - coarse ID	6
eleodes	Eleodes	No - coarse ID	1
eusattus	Eusattus	No - coarse ID	1
notibius	Notibius	No - coarse ID	1
pimeliinae	Pimeliinae	No - coarse ID	2
telabis	Telabis	No - coarse ID	5
tenebrionidae	Tenebrionidae	No - coarse ID	11
triorophus	Triorophus	No - coarse ID	1
			454

## Sheet: GBIF
Raw Verbatim Taxon Name	Interpretted	Valid Taxonomic Occurrence	Number of Records
Anepsius delicatulus	Anepsius delicatulus	Yes	3
Araeoschizus andrewsi	Araeoschizus andrewsi	Yes	1
Cryptoglossa laevis	Asbolus laevis	Yes	5
Cryptoglossa verrucosus	Asbolus verrucosus	Yes	5
Batulius setosus	Batulius setosus	Yes	1
Cerenopus concolor	Cerenopus concolor	Yes	9
Centrioptera muricata	Cryptoglossa muricata	Yes	15
Edrotes arens	Edrotes arens	Yes	4
Edrotes ventricosus	Edrotes ventricosus	Yes	9
Eleodes armata	Eleodes armata	Yes	4
Embaphion depressum	Embaphion depressum	Yes	4
Eupsophulus castaneus	Eupsophulus castaneus	Yes	1
Eusattus fortineri	Eusattus dilatatus	Yes	3
Cnemeplatia new	Lepidocnemeplatia n.sp.	Yes	3
Asidina confluens	Stenomorpha confluens	Yes	6
Eleodes armatus	Eleodes armata	No - Synonym	24
Edrotes arenis	Edrotes arens	No - Misspelling	2
Batuliodes	Batuliodes	No - coarse ID	3
Batulius	Batulius	No - coarse ID	3
Anemia	Cheirodes	No - coarse ID	1
Chilometapon	Chilometopon	No - coarse ID	2
Cnemodinus	Cnemodinus	No - coarse ID	3
Edrotes	Edrotes	No - coarse ID	4
Eleodes	Eleodes	No - coarse ID	1
Pimeliinae	Pimeliinae	No - coarse ID	2
Telabis	Telabis	No - coarse ID	3
Tenebrionidae	Tenebrionidae	No - coarse ID	11
Triorophus	Triorophus	No - coarse ID	1
			133
