# Supplementary material for: An updated checklist of the Tenebrionidae sec. Bousquet et al. 2018 of the Algodones Dunes of California, with comments on checklist data practices
Source: Biodivers Data J. 2018 Jun 14;(6):e24927. doi: 10.3897/BDJ.6.e24927 (PMC6013544; doi:10.3897/BDJ.6.e24927)
Supplement: Supplementary material 7 — Interpreted list of Tenebrionidae from Kimsey et al. 2017 with comments [file bdj-06-e24927-s007.xlsx]

## Sheet: Sheet1
Num	Name (Given from UCDC Checklist)	Species and Authorship correct?	Valid occurrence?	Coments
290	Alaephus macilentus Casey	Yes	Yes
291	Anepsius delicatulus LeConte	Yes	Yes
292	Araeoschizus andrewsi Papp	yes	Yes
293	Araeroschizus hardyi Papp	Yes	Yes
294	Araeoschizus hystrix Papp	Yes	No - probable misidentification
295	Araeroschizus sp.	-	-
296	Asbolus laevis LeConte	Yes	Yes
297	Asbolus papillosa Blaisdell	No	Yes	Asbolus papillosus (Triplehorn, 1964)
298	Asbolus verrucosus LeConte	Yes	Yes
299	Asidina confluens (LeConte)	No	Yes	Stenomorpha confluens (LeConte, 1851)
300	Batuliodes wasbaueri Doyen	Yes	Yes
301	Batulius setosus LeConte	Yes	Yes
302	Blapstinus histricus Casey	Yes	Yes
303	Centrioptera muricata LeConte	No	Yes	Cryptoglossa muricata (LeConte, 1851)
304	Cerenopus concolor LeConte	Yes	Yes
305	Cheirodes californica (Horn)	No	Yes	Cheirodes californicus (Horn, 1870)
306	Chilometopon abnorme Horn	No	Yes	Chilometopon abnorme (Horn, 1870)
307	Chilometopon brachystomum Doyen	Yes	Yes
308	Chilometopon pallidum Casey	Yes	Yes
309	Cnemodinus testaceous Horn	No	Yes	Cnemodinus testaceous (Horn, 1870)
310	Cryptoglossa muricata (LeConte)	Yes	Yes
311	Cryptoglossa verrucosa (LeConte)	No	No (syn)	Asbolus verrucosus LeConte, 1851
312	Edrotes arens LaRivers	Yes	Yes
313	Edrotes venticosus LeConte	Yes	Yes
314	Eleodes armatus LeConte	Yes	Yes
315	Eleodes lecontei Horn	Yes	No - probable misidentification	Only known from Rocky Mountains in Colorado
316	Embaphion depressum LeConte	n	Yes
317	Eusattus dilatatus LeConte	y	Yes
318	Eusattus productus LeConte	y	Yes
319	Eusattus ventricosus LeConte	No	No - duplicate misspelling	Must mean Edrotes ventricosus LeConte, 1851
320	Eusophulus castaneus Horn	No	Yes	Eupsophulus horni (Chamption, 1885)
321	Helops sp.	-	-
322	Hylocrinus sp.	-	-
323	Hymenorus sp. 1	-	-
324	Hymenorus sp. 2	-	-
325	Latheticus oryzae Waterhouse	Yes	No	Have not seen other dune records, could be mis-identification but could be a valid introduced stored product pest
326	Latheticus prosopis Chittenden	Yes	Yes
327	Ligyrus gibbosus (DeGeer)	?	No - scarab
328	Lobopoda sp.	-	No - probable misidentification	Not known west of Texas?
329	Meeysmus angustus (LeConte)	No	Yes	Mecysmus angustus (LeConte, 1851)
330	Metopoloba sp.	-	?	Known from the area, have not seen any dune records
331	Metoponium sp.	-	Yes
332	Nocibiotes crassipes (Casey)	Yes	Yes
333	Nocibiotes granulatus (LeConte)	Yes	Yes
334	Notibius laticeps Casey	Yes	No (syn)	Notibius puberulus LeConte, 1851
335	Notibius puberulus LeConte	Yes	Yes
336	Paratenetus sp.	-	No - probable misidentification
337	Telebis serrata (LeConte)	Yes	Yes
338	Telabis sp.	-	-
339	Tonibius sulcatus (Casey)	No	Yes	Tonibius sulcatus (LeConte, 1851
340	Tribolium castaneum (Herbst)	Yes	Yes
341	Trichasida hirsuta (LeConte)	No	Yes	Stenomorpha hirsuta (LeConte, 1851
342	Triorophus laevis Leconte	Yes	Yes
343	Ulus crassus LeConte	No	Yes	Ulus crassus (LeConte, 1851)
